# Supplementary material for: Very Large Pore Mesoporous Bioactive Silicate Glasses: Comparison of Behavior toward Classical Mesoporous Bioactive Glasses in Terms of Drug Loading/Release and Bioactivity
Source: MDPI journal article supplement (doi:10.3390/ma17020373), 2024-01-11
Supplement: s1 [file s1]

## SUPPLEMENTARY MATERIALS

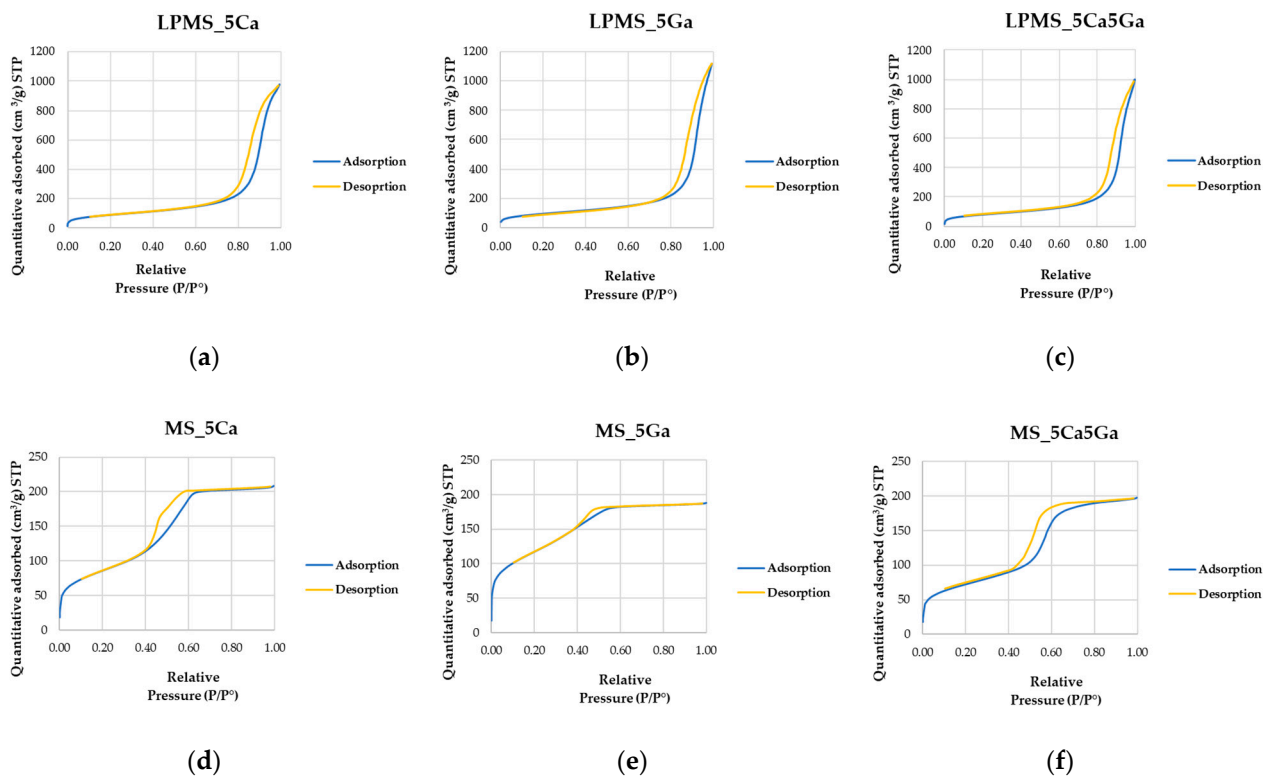

**Figure S1.** BET surface area analysis results: N<sub>2</sub>-adsorption-desorption isotherm plots of samples (a) LPMS\_5Ca, (b) LPMS\_5Ga, (c) LPMS\_5Ca5Ga, (d) MS\_5Ca, (e) MS\_5Ga, (f) MS\_5Ca5Ga.

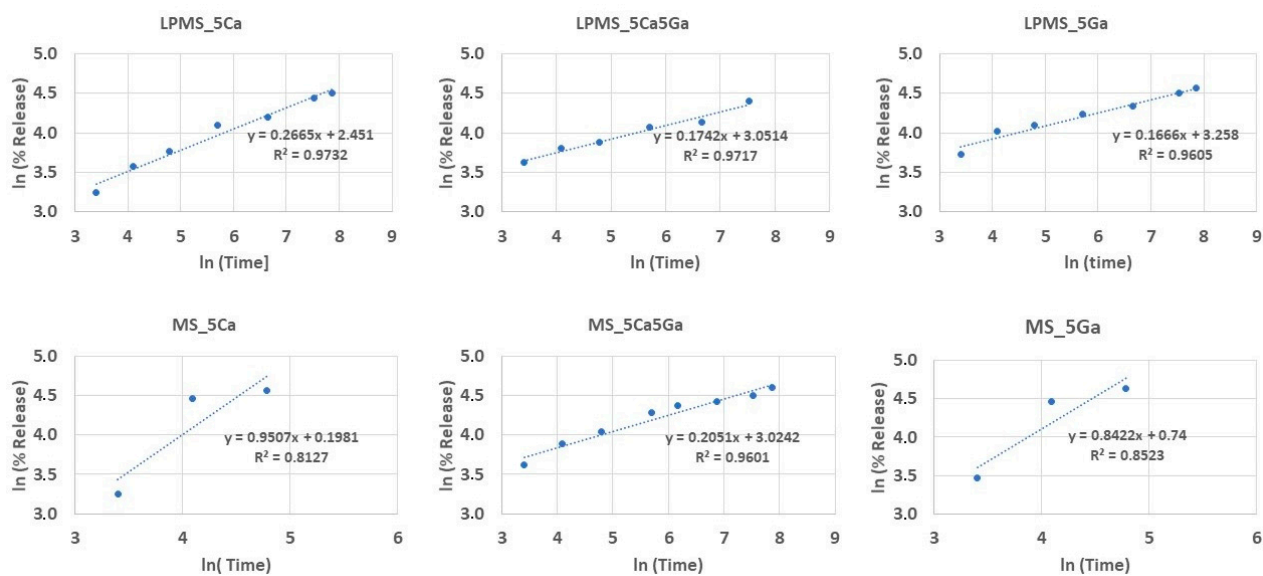

**Figure S2.** Korsmeyer-Peppas model release kinetics of nisin aspirin obtained for LPMS and MS samples.

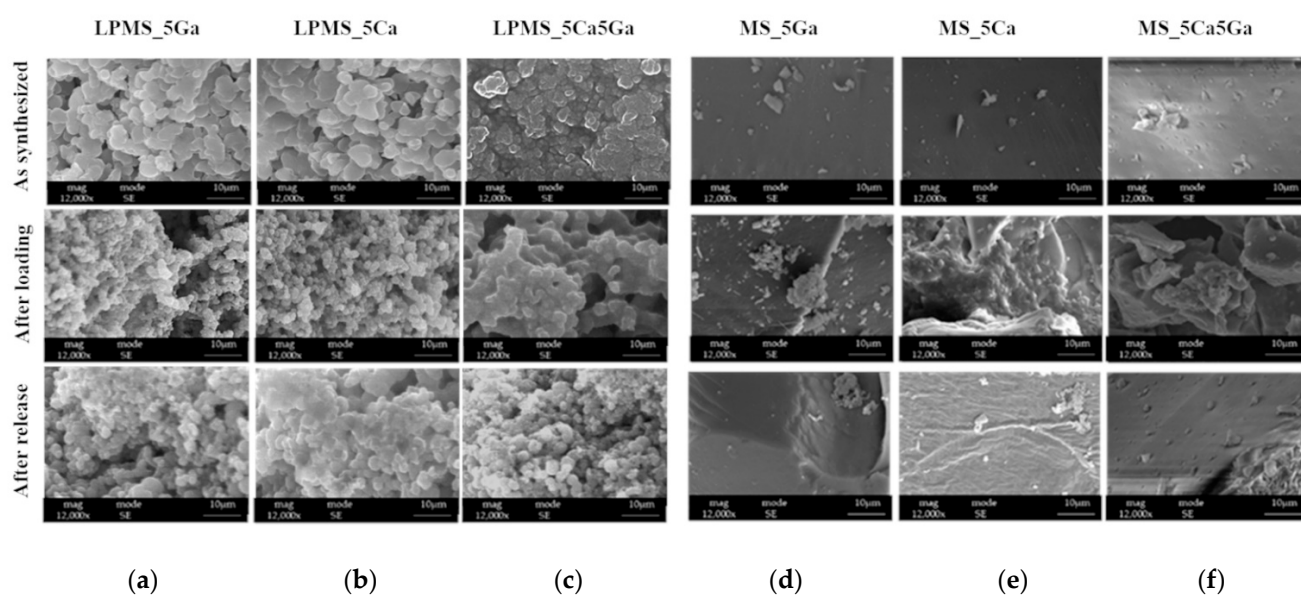

**Figure S3.** SEM-FEG images of (a) LPMS\_5Ga, (b) LPMS\_5Ca, (c) LPMS\_5Ca5Ga, (d) MS\_5Ga, (e) MS\_5Ca, (f) MS\_5Ca5Ga. In the first row are reported images of as synthesized structures, in the second are reported loaded structures, and in the last row are reported structures after nisin release.

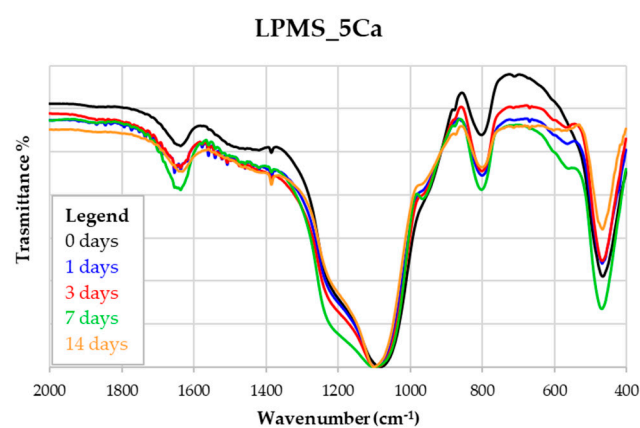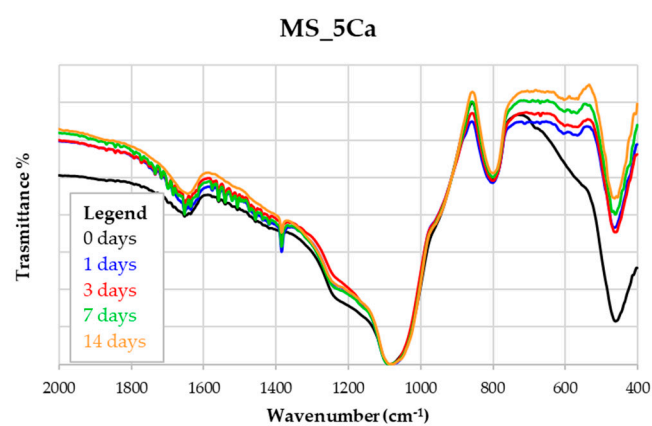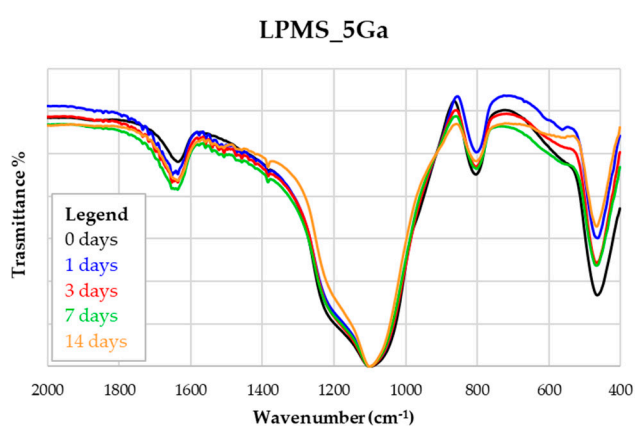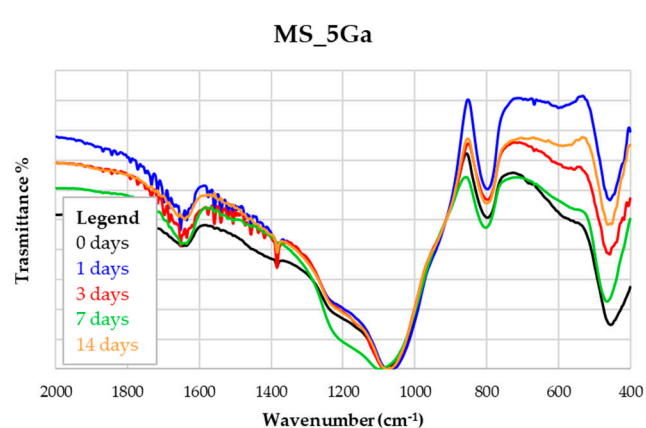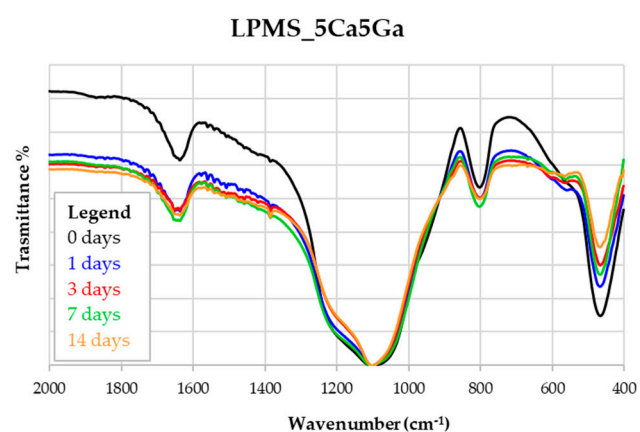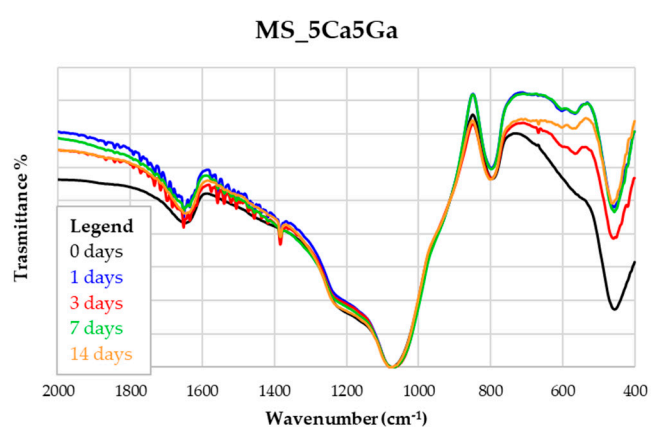

**Figure S4.** FT-IR spectra of all samples were acquired at 1, 3, 7, and 14 days for samples prepared as KBr pads. In order: (a) LPMS\_5Ca, (b) MS\_5Ca, (c) LPMS\_5Ga, (d) MS\_5Ga, (e) LPMS\_5Ca5Ga and (f) MS\_5Ca5Ga.

**Table S1.**  $SSA_{BET}$  and Total Pores Area determined respectively with  $N_2$  adsorption/desorption and Hg-Porosimetry.

| Sample      | $SSA_{BET}$<br>$N_2$ ads./des.<br>( $m^2/g$ ) | Pore Size<br>$N_2$ ads./des.<br>(nm) | Pore Volume<br>$N_2$ ads./des.<br>( $cm^3/g$ ) | Total Pores Area<br>Hg-Porosimetry<br>( $m^2/g$ ) |
|-------------|-----------------------------------------------|--------------------------------------|------------------------------------------------|---------------------------------------------------|
| LPMS_5Ca    | 323                                           | 16.3                                 | 1.56                                           | 392                                               |
| LPMS_5Ga    | 324                                           | 19.2                                 | 1.77                                           | 376                                               |
| LPMS_5Ca5Ga | 283                                           | 19.1                                 | 1.56                                           | 344                                               |
| MS_5Ca      | 306                                           | 4.0                                  | 0.31                                           | 73                                                |
| MS_5Ga      | 417                                           | 3.0                                  | 0.23                                           | 53                                                |
| MS_5Ca5Ga   | 252                                           | 4.8                                  | 0.29                                           | 179                                               |
